# Supplementary material for: PolyGlcNAc-containing exopolymers enable surface penetration by non-motile Enterococcus faecalis
Source: PubMed Central journal article supplement (PMC6386517; doi:10.1371/journal.ppat.1007571), 2019-02-11

S2 Fig.

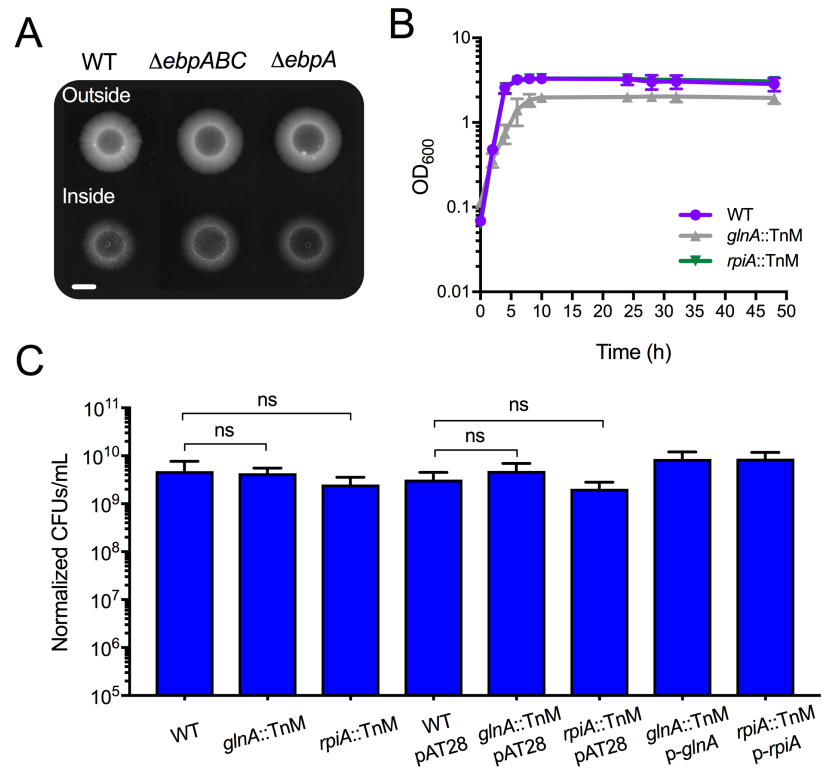

Supplement: ppat.1007571.s002.pdf [file ppat.1007571.s002.pdf]
