# Supplementary material for: PolyGlcNAc-containing exopolymers enable surface penetration by non-motile Enterococcus faecalis
Source: PubMed Central journal article supplement (PMC6386517; doi:10.1371/journal.ppat.1007571), 2019-02-11
Supplement: ppat.1007571.s007.pdf [file ppat.1007571.s007.pdf]

**S1 Table.** One-way ANOVA and Turkey's multiple comparison test of the non-invading cells.

| Tukey's multiple comparisons test                         | Summary | Adjusted P Value |
|-----------------------------------------------------------|---------|------------------|
| WT vs. <i>glnA</i> ::TnM                                  | ns      | >0.9999          |
| WT vs. <i>rpiA</i> ::TnM                                  | ns      | 0.6291           |
| WT vs. WT<br>pAT28                                        | ns      | 0.9077           |
| WT vs. <i>glnA</i> ::TnM<br>pAT28                         | ns      | >0.9999          |
| WT vs. <i>rpiA</i> ::TnM<br>pAT28                         | ns      | 0.4035           |
| WT vs. <i>rpiA</i> ::TnM p- <i>rpiA</i>                   | ns      | 0.0606           |
| WT vs. <i>glnA</i> ::TnM<br>p- <i>glnA</i>                | ns      | 0.0779           |
| <i>glnA</i> ::TnM vs. <i>rpiA</i> ::TnM                   | ns      | 0.8454           |
| <i>glnA</i> ::TnM vs. WT<br>pAT28                         | ns      | 0.986            |
| <i>glnA</i> ::TnM vs. <i>glnA</i> ::TnM<br>pAT28          | ns      | 0.9999           |
| <i>glnA</i> ::TnM vs. <i>rpiA</i> ::TnM<br>pAT28          | ns      | 0.6426           |
| <i>glnA</i> ::TnM vs. <i>rpiA</i> ::TnM p- <i>rpiA</i>    | *       | 0.0236           |
| <i>glnA</i> ::TnM vs. <i>glnA</i> ::TnM<br>p- <i>glnA</i> | *       | 0.0311           |
| <i>rpiA</i> ::TnM vs. WT<br>pAT28                         | ns      | 0.9994           |
| <i>rpiA</i> ::TnM vs. <i>glnA</i> ::TnM<br>pAT28          | ns      | 0.6105           |
| <i>rpiA</i> ::TnM vs. <i>rpiA</i> ::TnM<br>pAT28          | ns      | >0.9999          |
| <i>rpiA</i> ::TnM vs. <i>rpiA</i> ::TnM p- <i>rpiA</i>    | ***     | 0.0004           |
| <i>rpiA</i> ::TnM vs. <i>glnA</i> ::TnM<br>p- <i>glnA</i> | ***     | 0.0005           |
| WT<br>pAT28 vs. <i>glnA</i> ::TnM<br>pAT28                | ns      | 0.8974           |
| WT<br>pAT28 vs. <i>rpiA</i> ::TnM<br>pAT28                | ns      | 0.9856           |
| WT<br>pAT28 vs. <i>rpiA</i> ::TnM p- <i>rpiA</i>          | **      | 0.002            |

|                                                                          |     |         |
|--------------------------------------------------------------------------|-----|---------|
| WT                                                                       |     |         |
| pAT28 vs. <i>glnA</i> ::TnM<br>p- <i>glnA</i>                            | **  | 0.0027  |
| <i>glnA</i> ::TnM                                                        |     |         |
| pAT28 vs. <i>rpiA</i> ::TnM<br>pAT28                                     | ns  | 0.3866  |
| <i>glnA</i> ::TnM                                                        |     |         |
| pAT28 vs. <i>rpiA</i> ::TnM p- <i>rpiA</i>                               | ns  | 0.0648  |
| <i>glnA</i> ::TnM                                                        |     |         |
| pAT28 vs. <i>glnA</i> ::TnM<br>p- <i>glnA</i>                            | ns  | 0.0832  |
| <i>rpiA</i> ::TnM                                                        |     |         |
| pAT28 vs. <i>rpiA</i> ::TnM p- <i>rpiA</i>                               | *** | 0.0001  |
| <i>rpiA</i> ::TnM                                                        |     |         |
| pAT28 vs. <i>glnA</i> ::TnM<br>p- <i>glnA</i>                            | *** | 0.0002  |
| <i>rpiA</i> ::TnM p- <i>rpiA</i> vs. <i>glnA</i> ::TnM<br>p- <i>glnA</i> | ns  | >0.9999 |

---

Mean±SE; n=6; \* $P<0.05$ ; \*\* $P<0.01$ ; \*\*\* $P<0.001$ ; \*\*\*\*  $P<0.0001$  for both the one-way ANOVA and Tukey's multiple comparison test; nonsignificant, ns.
