# Supplementary material for: PolyGlcNAc-containing exopolymers enable surface penetration by non-motile Enterococcus faecalis
Source: PubMed Central journal article supplement (PMC6386517; doi:10.1371/journal.ppat.1007571), 2019-02-11
Supplement: ppat.1007571.s008.pdf [file ppat.1007571.s008.pdf]

**S2 Table.** List of putative genes evaluated by Nanostring analysis.

| V583 ID# | MMH594 ID# | DESCRIPTION                                                                                                                |
|----------|------------|----------------------------------------------------------------------------------------------------------------------------|
| EF0590   | EOI84245.1 | Polysaccharide deacetylase family                                                                                          |
| EF0887   | EOI83927.1 | Group 2 glycosyltransferase                                                                                                |
| EF2167   | EOI81775.1 | Group 2 glycosyltransferase                                                                                                |
| EF2176   | EOI81783.1 | Group 2 glycosyltransferase                                                                                                |
| EF2491   | EOI79425.1 | <i>cpsE</i> , group 2 glycosyltransferase                                                                                  |
| EF2492   | EOI79426.1 | <i>cpsD</i> , group 2 glycosyltransferase                                                                                  |
| EF2890   | EOI79754.1 | glycosyltransferase family                                                                                                 |
| EF2891   | EOI79755.1 | glycosyltransferase family                                                                                                 |
| EF2908   | EOI79016.1 | Group 2 glycosyltransferase                                                                                                |
| EF2198   | EOI81802.1 | <i>epaA</i> , group 4 glycosyltransferase; Epa rhamnopolysaccharide synthesis                                              |
| EF2195   | EOI81799.1 | <i>epaD</i> in operon with <i>epaB</i> and <i>epaC</i> . Group 2 glycosyltransferases; Epa rhamnopolysaccharides synthesis |
| EF2190   | EOI81802.1 | <i>epaI</i> , group 2 glycosyltransferase                                                                                  |
| EF2180   | EOI81787.1 | <i>epaO</i> , in operon with 2181 ( <i>epaN</i> ), two group 2 glycosyltransferases. Epa rhamnopolysaccharides synthesis   |
| EF2170   | EOI81778.1 | <i>epaX</i> , group 2 glycosyltransferase                                                                                  |
| EF3269   | EOI78937.1 | <i>folB</i> , folate biosynthesis; dihydroneopterin aldolase                                                               |
| EF0005   | EOI85150.1 | <i>gyrB</i> , DNA gyrase                                                                                                   |
| EF1522   | EOI81171.1 | <i>sigA</i> , RNA polymerase sigma factorD                                                                                 |
| EF1192   | EOI80855.1 | <i>aqpZ</i> , aquaporin                                                                                                    |
| EF3066   | EOI78758.1 | <i>def</i> , peptide deformylase                                                                                           |
