# Supplementary material for: PolyGlcNAc-containing exopolymers enable surface penetration by non-motile Enterococcus faecalis
Source: PubMed Central journal article supplement (PMC6386517; doi:10.1371/journal.ppat.1007571), 2019-02-11
Supplement: ppat.1007571.s009.pdf [file ppat.1007571.s009.pdf]

**S3 Table.** Strains and plasmid list used in this study.

| Strain name                  | Parental background | Source           | Description                                                                                                                                                                                                                 | Reference   |
|------------------------------|---------------------|------------------|-----------------------------------------------------------------------------------------------------------------------------------------------------------------------------------------------------------------------------|-------------|
| <i>Enterococcus faecalis</i> |                     |                  |                                                                                                                                                                                                                             |             |
| DK11                         | JH2-2               | Clinical         | WT plasmidless strain derived from JH2                                                                                                                                                                                      | 74          |
| DK10                         | OG1RF               | Oral             | WT plasmid free, commensal; Rif <sup>r</sup> , Fus <sup>r</sup>                                                                                                                                                             | 77          |
| DK13                         | OG1RF               | --               | <i>ΔepaB</i>                                                                                                                                                                                                                | Gilmore Lab |
| DK255                        | OG1RF               | --               | <i>ΔebpABC</i>                                                                                                                                                                                                              | 26          |
| DK256                        | OG1RF               | --               | <i>ΔebpA</i>                                                                                                                                                                                                                | 26          |
| DK29                         | OG1RF               | --               | pMV158-GFP, conjugation donor                                                                                                                                                                                               | 78          |
| DK30                         | V583                | Blood            | Clinical WT Van <sup>r</sup>                                                                                                                                                                                                | 75          |
| DK1                          | VE14089             | Blood            | Plasmidless strain derived from V583                                                                                                                                                                                        | 83          |
| DK2                          | VE14089             | --               | <i>ΔepaX</i>                                                                                                                                                                                                                | 46          |
| DK3                          | VE14089             | --               | <i>ΔepaX::epaX</i> ; Erm <sup>r</sup>                                                                                                                                                                                       | 46          |
| DK287                        | VE14089             | --               | WT, pMV158-GFP, Tet <sup>r</sup>                                                                                                                                                                                            | This study  |
| DK288                        | VE14089             | --               | <i>ΔepaX</i> , pMV158-GFP, Tet <sup>r</sup>                                                                                                                                                                                 | This study  |
| DK8                          | MMH594              | Blood            | Clinical WT Erm <sup>r</sup> , Gen <sup>r</sup>                                                                                                                                                                             | 76          |
| DK250                        | MMH594              | --               | WT, empty pAT28 vector; Sp <sup>r</sup>                                                                                                                                                                                     | This study  |
| DK19                         | MMH594              | --               | WT, pMV158-GFP, Tet <sup>r</sup>                                                                                                                                                                                            | This study  |
| DK20                         | MMH594              | --               | WT, pMV158-mCherry, Tet <sup>r</sup>                                                                                                                                                                                        | Gilmore lab |
| DK16                         | MMH594              | --               | <i>glnA::TnM</i> ; Cm <sup>r</sup>                                                                                                                                                                                          | This study  |
| DK251                        | MMH594              | --               | <i>glnA::TnM</i> , empty pAT28 vector; Cm <sup>r</sup> , Sp <sup>r</sup>                                                                                                                                                    | This study  |
| DK252                        | MMH594              | --               | <i>glnA::TnM</i> , pAT28- <i>glnRA</i> ; Cm <sup>r</sup> , Sp <sup>r</sup>                                                                                                                                                  | This study  |
| DK18                         | MMH594              | --               | <i>glnA::TnM</i> ; pMV158-GFP; Cm <sup>r</sup> , Tet <sup>r</sup>                                                                                                                                                           | This study  |
| DK14                         | MMH594              | --               | <i>rpiA::TnM</i> ; Cm <sup>r</sup> ;                                                                                                                                                                                        | This study  |
| DK253                        | MMH594              | --               | <i>rpiA::TnM</i> , empty pAT28 vector; Cm <sup>r</sup> , Sp <sup>r</sup>                                                                                                                                                    | This study  |
| DK15                         | MMH594              | --               | <i>rpiA::TnM</i> , pAT28- <i>rpiA</i> ; Cm <sup>r</sup> , Sp <sup>r</sup>                                                                                                                                                   | This study  |
| DK17                         | MMH594              | --               | <i>rpiA::TnM</i> ; pMV158-GFP; Cm <sup>r</sup> , Tet <sup>r</sup>                                                                                                                                                           | This study  |
| DK267                        | MMH594              | --               | $\Delta$ EF2170                                                                                                                                                                                                             | This study  |
| DK21                         | 1230                | Clinical         | WT                                                                                                                                                                                                                          | 73          |
| <i>Escherichia coli</i>      |                     |                  |                                                                                                                                                                                                                             |             |
| DK91                         | DH5 $\alpha$        | --               | F <sup>-</sup> $\Phi$ 80 <i>lacZ</i> $\Delta$ M15 $\Delta$ ( <i>lacZYA-argF</i> ) U169 <i>recA1 endA1 hsdR17</i> (rk <sup>-</sup> , mk <sup>+</sup> ) <i>phoA supE44 <math>\lambda</math> thi<sup>-1</sup> gyrA96 relA1</i> | Stratagene  |
| <i>Staphylococcus aureus</i> |                     |                  |                                                                                                                                                                                                                             |             |
| DK43                         | MN8                 | Urogenital tract | WT                                                                                                                                                                                                                          | 32          |
| DK44                         | MN8                 | --               | <i>Δica</i> , PNAG(PIA) deficient strain                                                                                                                                                                                    | 32          |
| <i>Candida albicans</i>      |                     |                  |                                                                                                                                                                                                                             |             |
| DK80                         | SC5314              | --               | Prototrophic clinical isolate                                                                                                                                                                                               | 80          |
| <b>Plasmids</b>              |                     |                  |                                                                                                                                                                                                                             |             |
| pMINIMAD                     |                     |                  | Thermosensitive plasmid; Amp <sup>r</sup>                                                                                                                                                                                   | 81          |
| pLT06                        |                     |                  | Deletion construct used for amplification of Cm <sup>r</sup> cassette ( <i>camR</i> )                                                                                                                                       | 10          |
| pIC333                       |                     |                  | Deletion construct used for amplification of Sp <sup>r</sup> cassette ( <i>spcR</i> )                                                                                                                                       | 79          |
| pJR02                        |                     |                  | pMINIMAD vector with EF2170:: <i>spcR</i> deletion construct; Amp <sup>r</sup>                                                                                                                                              | This study  |
| pJR03                        |                     |                  | Derived from pJR02 with Cm <sup>r</sup> from pLT06 vector; Amp <sup>r</sup> , Cm <sup>r</sup>                                                                                                                               | This study  |
| pAT28                        |                     |                  | Complementation vector                                                                                                                                                                                                      | 82          |
| pJR01                        |                     |                  | <i>glnRA</i> complementation vector                                                                                                                                                                                         | This study  |
| pAH01                        |                     |                  | <i>rpiA</i> complementation vector                                                                                                                                                                                          | This study  |
| pMV158                       |                     |                  | GFP cassette; Cm <sup>r</sup> , Tet <sup>r</sup>                                                                                                                                                                            | 92          |

Amp<sup>r</sup>, ampicillin resistant; Rif<sup>r</sup>, rifampin resistant; Fus<sup>r</sup>, fusidic acid resistant; Sp<sup>r</sup>, spectinomycin resistant; Tet<sup>r</sup>, tetracycline resistant; Cm<sup>r</sup>, chloramphenicol resistant; Em<sup>r</sup>, erythromycin resistant. *E. faecalis* MMH594 strains harboring pAT28 vector and derivatives required 750  $\mu$ g/mL spectinomycin. Transposon insertion strains required 10  $\mu$ g/mL chloramphenicol. Fluorescent reporter strains harboring pMV158 derivatives needed 15  $\mu$ g/mL tetracycline. *E. faecalis* harboring pLT06 derivatives required 15  $\mu$ g/mL chloramphenicol. pMINIMAD derivatives required 100  $\mu$ g/mL ampicillin. WT: Wild type.
