# Supplementary material for: PolyGlcNAc-containing exopolymers enable surface penetration by non-motile Enterococcus faecalis
Source: PubMed Central journal article supplement (PMC6386517; doi:10.1371/journal.ppat.1007571), 2019-02-11
Supplement: ppat.1007571.s010.pdf [file ppat.1007571.s010.pdf]

**S4 Table.** List of primers used in this study.

| Name     | Sequence 5' - 3'                             | Restriction Enzyme |
|----------|----------------------------------------------|--------------------|
| JD1      | CAGACGTTGAACGAGTTTTAG                        |                    |
| JD2      | GGAGGATCCACCAGATTGGACGAAAGTAAC               | BamHI              |
| JD3      | GCAATAACAGGTGCTTACTTTCATATCAATTTCCGCTACCTTC  |                    |
| JD4      | GAAGGTAGCGGAAATTGATATGAAAGTAAGCACCTGTTATTGC  |                    |
| JD5      | GGAAGACCAAACATAAGTAAAATCCACCTAGATCCTTTTGACTC |                    |
| JD6      | GAGTCAAAGGATCTAGGTGGATTTTACTTATGTTTGGTCTTCC  |                    |
| JD7      | GGAGGATCCCTTTTGGTACTTCAATATTCCTG             | BamHI              |
| JD8      | CCTCAACATCTGGTCTCTTAG                        |                    |
| JD15     | GAAGAATTCCAAATGATGGAATTACTIONGAG             | EcoRI              |
| JD30     | GGAGGATCCATTCATTCACAAACTAAAGAACG             | BamHI              |
| JD44     | GTCGTCGACCAACGTGAATTTAGGTTTTGG               | Sall               |
| JD45     | GTCGTCGACCGATTCAAAAAAATAGGCAC                | Sall               |
| HV172    | CCAGGGATCCGTAAGTTGTGACCGATACCTG              | BamHI              |
| HV173    | CCAGTCTAGACATTCTTAACGTGCGGGAAC               | XbaI               |
| TnMextF1 | GAGAGCTTAGTACGTGAAACATG                      |                    |
| TnMextF2 | AGCGACGCCATCTATGTGTCAGAC                     |                    |

Restriction sites are underlined
